# Supplementary material
Source: PubMed Central journal article supplement (PMC5117935)
Supplement: ejhg201686x3.pdf [file ejhg201686x3.pdf]

## Supplementary Figure 1. SNP-array, qPCR and MAQ assay results putative *de novo* CNV

### of article entitled:

Copy Number Variations in 375 patients with oesophageal atresia and/or tracheoesophageal fistula.

### Authors and affiliations

Erwin Brosens<sup>1,2\*</sup>, Florian Marsch<sup>3\*</sup>, Elisabeth M. de Jong<sup>1,2</sup>, Hitisha P. Zaveri<sup>4</sup>, Alina C. Hilger<sup>3</sup>, Vera Gisela Choinitzki<sup>3</sup>, Alice Hölscher<sup>5</sup>, Per Hoffmann<sup>3,6</sup>, Stefan Herms<sup>3,6</sup>, Thomas M. Boemer<sup>5</sup>, Benno M. Ure<sup>7</sup>, Martin Lacher<sup>7</sup>, Michael Ludwig<sup>8</sup>, Bert H. Eussen<sup>1</sup>, Robert M. van der Helm<sup>1</sup>, Hannie Douben<sup>1</sup>, Diane van Opstal<sup>1</sup>, Rene M.H. Wijnen<sup>2</sup>, H. Berna Beverloo<sup>1</sup>, Yolande van Bever<sup>1</sup>, Alice S. Brooks<sup>1</sup>, Hanneke IJsselstijn<sup>2</sup>, Daryl A. Scott<sup>4</sup>, Johannes Schumacher<sup>3</sup>, Dick Tibboel<sup>2</sup>, Heiko Reutter<sup>3,\*</sup>, Annelies de Klein<sup>1\*</sup>

<sup>1</sup>Department of Clinical Genetics, Erasmus Medical Centre – Sophia Children’s Hospital, Rotterdam, the Netherlands.

<sup>2</sup>Department of Pediatric Surgery, Erasmus Medical Centre – Sophia Children’s Hospital, Rotterdam, the Netherlands. <sup>3</sup>Institute of Human Genetics, University of Bonn, Bonn, Germany. <sup>4</sup>Department of Molecular and Human Genetics and <sup>5</sup>Departments of Molecular Physiology and Biophysics, Baylor College of Medicine, Houston, Texas, USA. <sup>6</sup>Department of Pediatric Surgery and Urology, Children’s Hospital of Cologne, Cologne, Germany <sup>7</sup>Human Genomics Research Group, Department of Biomedicine, University Hospital and University of Basel, Basel, Switzerland. <sup>8</sup>Center of Pediatric Surgery Hannover, Hannover Medical School and Bult Children’s Hospital, Hannover, Germany. <sup>9</sup>Department of Clinical Chemistry and Clinical Pharmacology, University of Bonn, Bonn, Germany. <sup>9</sup>Department of Neonatology and Pediatric Intensive Care, University of Bonn, Bonn, Germany. \*authors contributed equally to the manuscript

### \*authors contributed equally to the manuscript

Corresponding Author:

#E. Brosens PhD

Erasmus Medical Centre – Sophia Children’s Hospital

Room Ee971

P.O. Box 2040

3000 CA Rotterdam

Tel +31 10 70 37643

Fax: +31 10 70 44736

## DE21OSOUKBD100141; Gain 2q21.1 (Chr2:131349899-13191166)

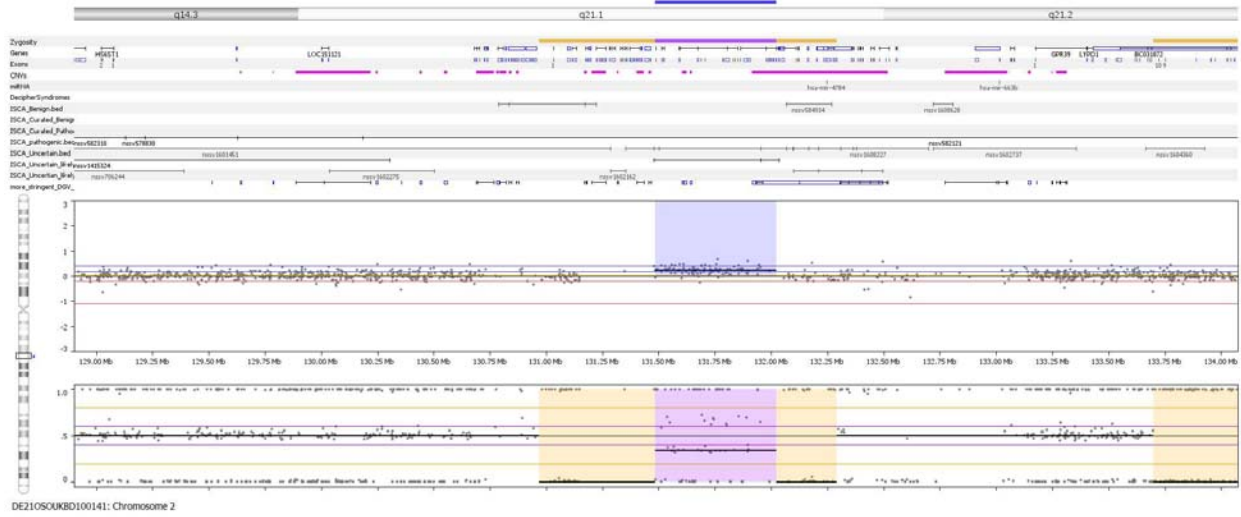

|               | Forward primer       | Reverse primer       | Size | Chromosome | Start     | Stop      |
|---------------|----------------------|----------------------|------|------------|-----------|-----------|
| QPCR_1_2q21.1 | CAACCTGTGACAAAGCCAGC | TGCAGGGTGTCTTGCTGATG | 119  | Chr2       | 131486688 | 131486806 |
| QPCR_2_2q21.1 | AGAGGAAGGACAGCGTGTC  | TGACTGTGAGAGCAACTGGG | 131  | Chr2       | 131688450 | 131688580 |
| QPCR_3_2q21.1 | GACTGCATCAACATCCGCAC | GGGAAGGAAGAGGACCAAGC | 115  | Chr2       | 131883442 | 131883556 |

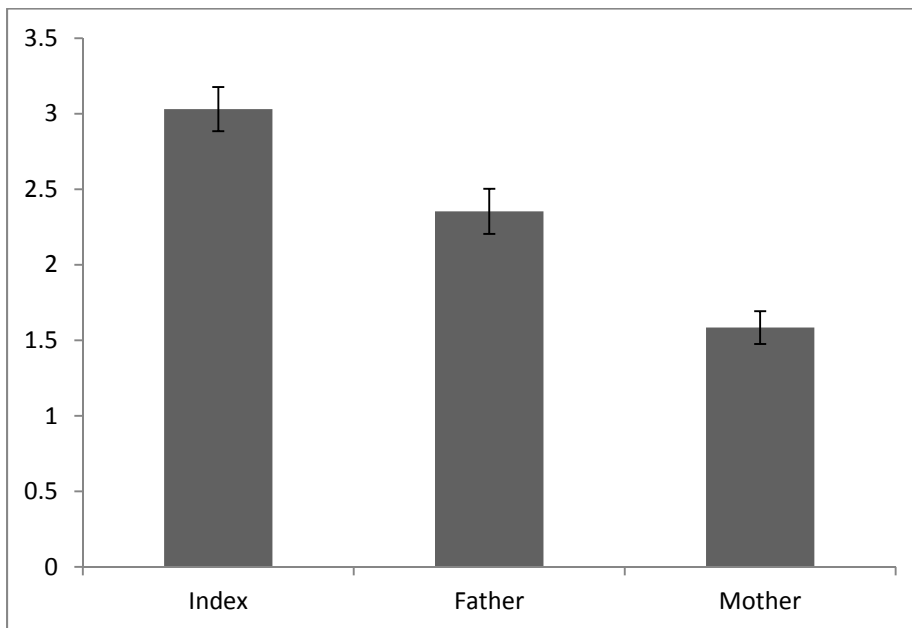

qPCR cutoff for duplication 2.5 and at least two out of three primer pairs matching the criteria.

## DE12OSOUKBD100206; Gain 3p26.1(Chr3:8519329-8551649)

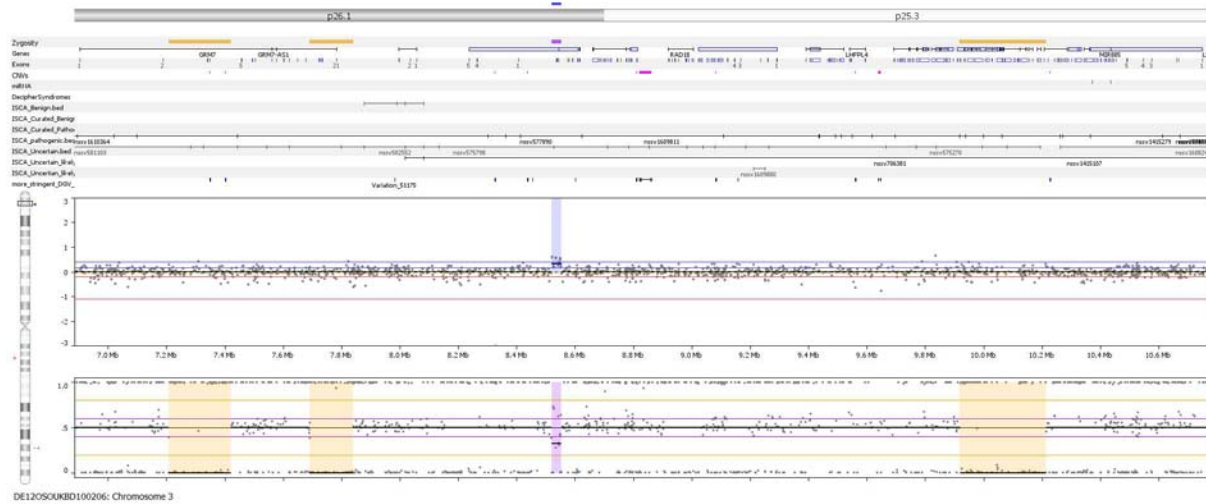

| Amplicon      | Forward primer        | Reverse primer       | Size | Chromosome | Start   | Stop    |
|---------------|-----------------------|----------------------|------|------------|---------|---------|
| QPCR_1_3p26.1 | TGACAACGACATCTGCAATCG | TCCAGGGCCACAGTTAACAC | 136  | Chr3       | 8523922 | 8524057 |
| QPCR_2_3p26.1 | AGGTGTCCGGTTAAGTCTCTG | TGTAGGCAGAGAGGGGATCC | 139  | Chr3       | 8540503 | 8540641 |
| QPCR_3_3p26.1 | GGTGGCTAAGGACCTCAACC  | AGTTTCCGCGAACAGATGGG | 109  | Chr3       | 8543633 | 8543741 |

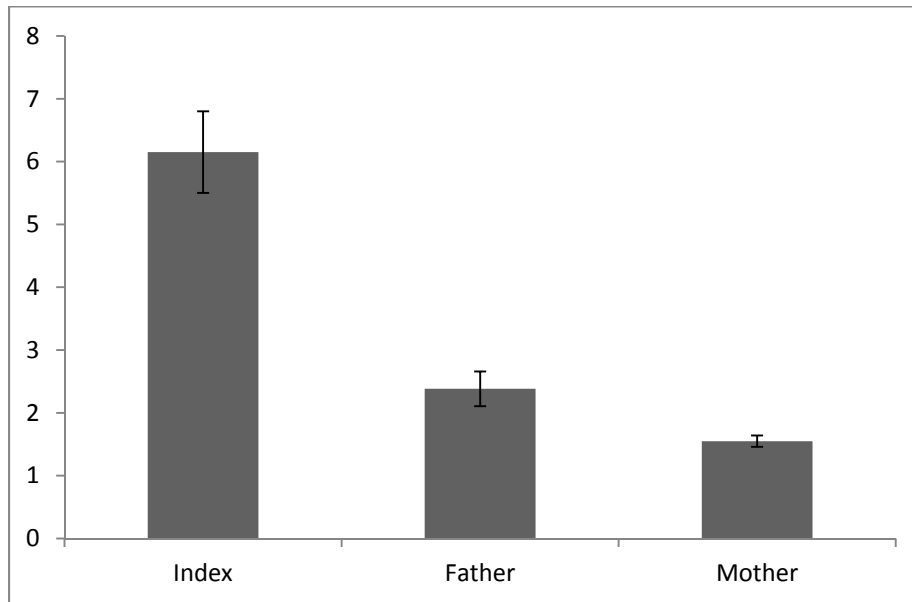

qPCR cutoff for duplication 2.5 and at least two out of three primer pairs matching the criteria.

**SKZ\_2111; loss 7q35q36 (chr7:143,839,360-159,138,663)**

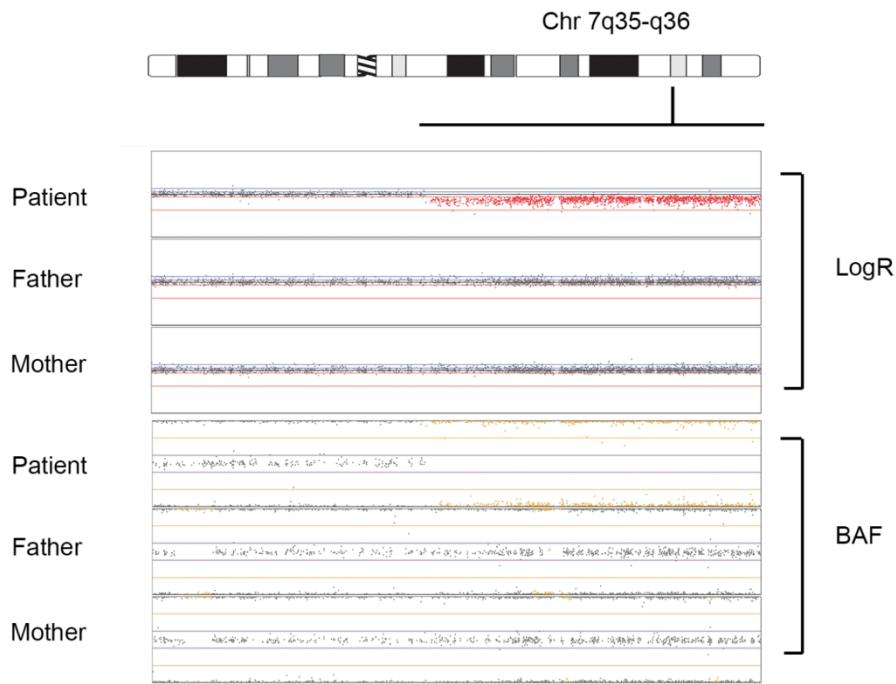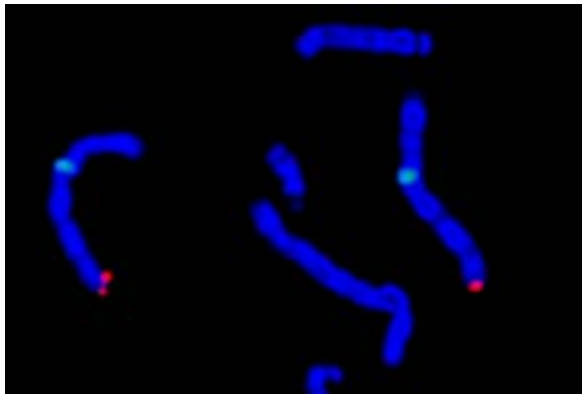

BAC clone 7qter (red+ BAC clone RPI-3K23 (green) in father

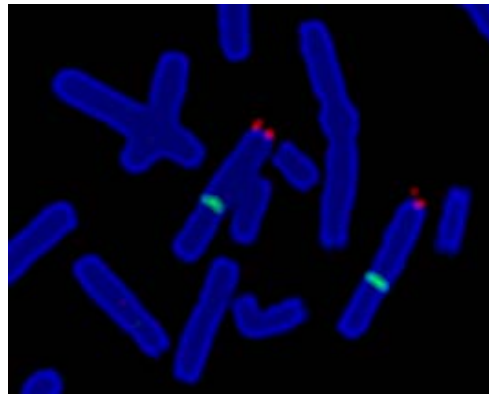

BAC clone 7qter (red+ BAC clone RPI-3K23 (green) in mother

The 7q35q36 loss is not the result of a balanced translocation in one of the parents

**SKZ\_1810; Gain 8p22 (chr8:17625479-17813225)**

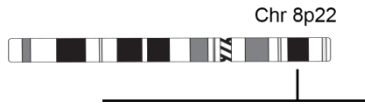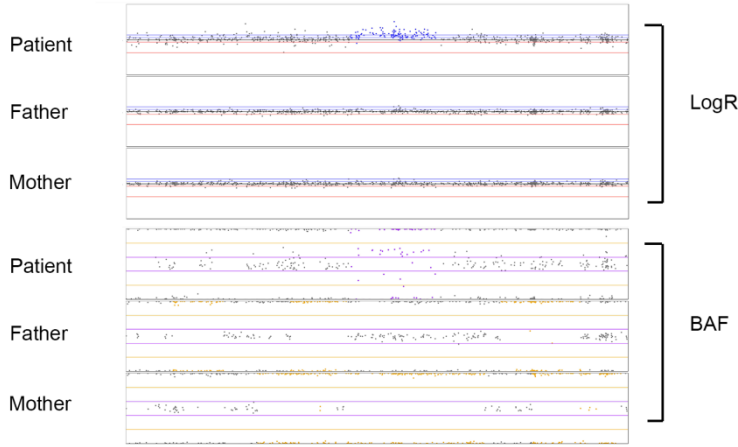

**SKZ\_1810 gain 8p22**

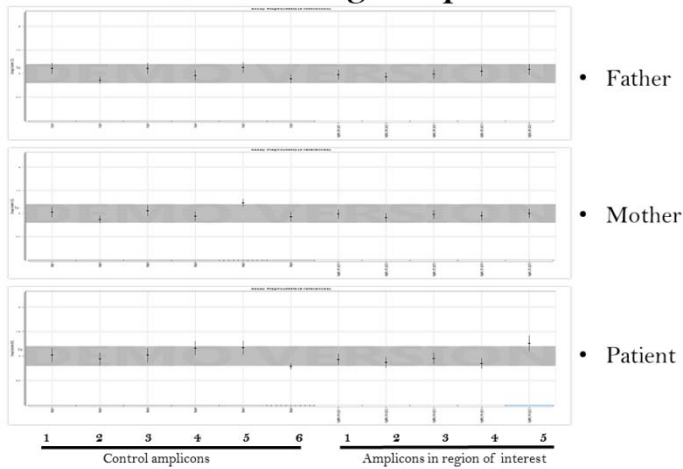

| Amplicon            | Forward primer                                      | Reverse primer                          | Size | Chr  | Start    | Stop     |
|---------------------|-----------------------------------------------------|-----------------------------------------|------|------|----------|----------|
| FlagMAQ_1810_8p22.1 | 5'AGCGGATAACAATTCACACAGGCTCTCAACTCCAAATCTCAACC-3'   | 5'-GTTTCTTGATGTGTACGATTAGATTAAGGCAGA-3' | 245  | chr8 | 17545893 | 17546107 |
| FlagMAQ_1810_8p22.2 | 5'AGCGGATAACAATTCACACAGGAGCCATGTGCTGCAAACC-3'       | 5'-GTTTCTTTGAAGCCTCAAGTGTGAAAGC-3'      | 169  | chr8 | 17600090 | 17600228 |
| FlagMAQ_1810_8p22.3 | 5'AGCGGATAACAATTCACACAGGCCAAGTGAACCTCCAAGC-3'       | 5'-GTTTCTTGATGAAGTGTCTCCACGAACC-3'      | 214  | chr8 | 17669963 | 17670146 |
| FlagMAQ_1810_8p22.4 | 5'AGCGGATAACAATTCACACAGGCACAACCTGCACCAAAAGCTA-3'    | 5'-GTTTCTTTGGCAGGCACAATACAGG-3'         | 295  | chr8 | 17754984 | 17755248 |
| FlagMAQ_1810_8p22.5 | 5'AGCGGATAACAATTCACACAGGAGCTAACATGGCAACAGAATAATG-3' | 5'-GTTTCTTGGAAAGAGAATGTCCAAATATGC-3'    | 180  | chr8 | 17823952 | 17824101 |

**SKZ\_1810; loss 11p14.3 (chr11:21853276-22016176)**

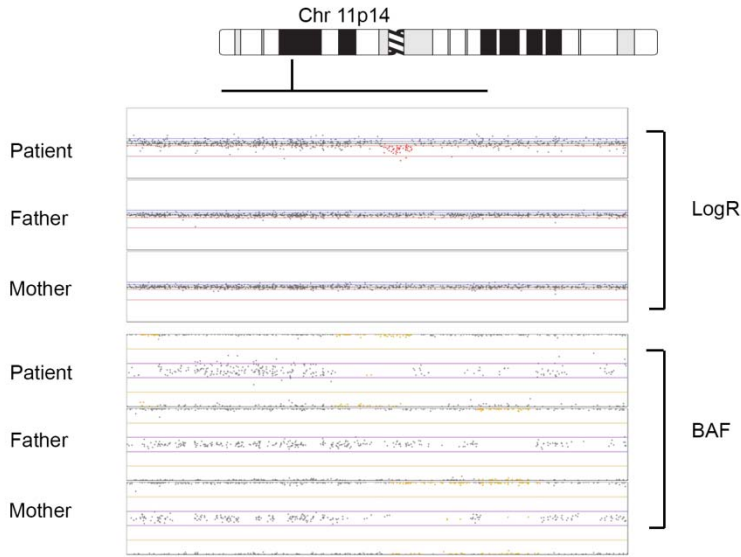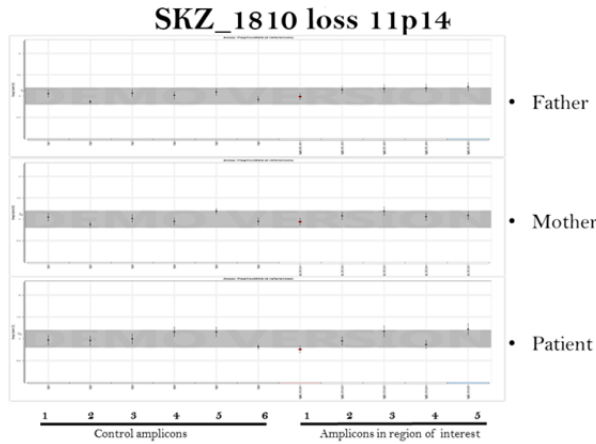

| Amplicon             | Forward primer                                        | Reverse primer                        | Size | Chr   | Start    | Stop     |
|----------------------|-------------------------------------------------------|---------------------------------------|------|-------|----------|----------|
| FlagMAQ_1810_11p14.1 | 5'AGCGGATAACAATTTACACAGGAGGCCTACGAGGGAATGC-3'         | 5'-GTTTCTTGGGCAAACACCAACAGGA-3'       | 113  | chr11 | 21795830 | 21795912 |
| FlagMAQ_1810_11p14.2 | 5'AGCGGATAACAATTTACACAGGTGAGTATTCACAGGAATAAAGTGG-3'   | 5-GTTTCTTGGTGCAGGCTTTGAGTCC-3'        | 197  | chr11 | 21849190 | 21849356 |
| FlagMAQ_1810_11p14.3 | 5'AGCGGATAACAATTTACACAGGTGTTGAGCAACCA AGAGAAATTAAG-3' | 5-GTTTCTCAACAACATAAGTGTCCACTGA-3'     | 184  | chr11 | 21918986 | 21919139 |
| FlagMAQ_1810_11p14.4 | 5'AGCGGATAACAATTTACACAGGAGTGGAGTTATTAAGGCTGAGGA-3'    | 5-GTTTCTTTGTGGCAGGGAGTGAATG-3'        | 177  | chr11 | 21996140 | 21996286 |
| FlagMAQ_1810_11p14.5 | 5'AGCGGATAACAATTTACACAGGCAGAGCCTCACTACCCACAGA-3'      | 5-GTTTCTTTTAATATTCGCTCTCAATAATGTCC-3' | 136  | chr11 | 22067921 | 22068026 |

**SKZ\_1662; loss 13q12.11 (chr13:22688792-22981935)**

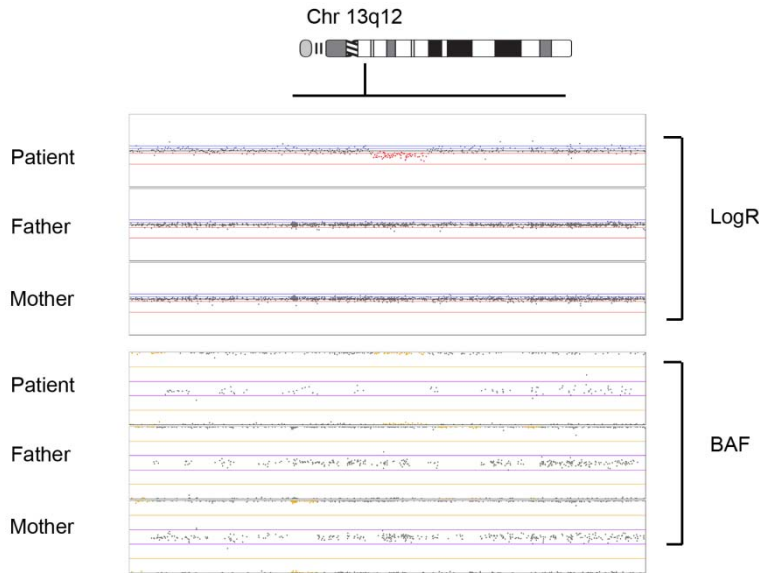

**SKZ\_1662 loss 13q12.11**

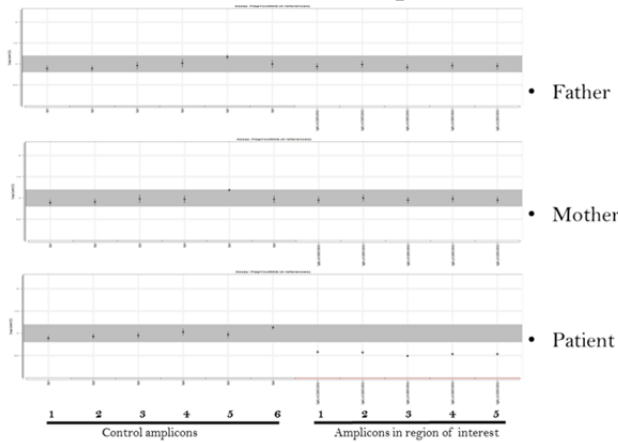

| Amplicon                          | Forward primer                                      | Reverse primer                        | Size | Chr.  | Start    | Stop     |
|-----------------------------------|-----------------------------------------------------|---------------------------------------|------|-------|----------|----------|
| FlagMAQ_chr13:22688792-22981935.1 | 5'AGCGGATAACAATTTACACAGGGGTGTAGTTTGCTTAATTCACAGG-3' | 5'-GTTTCTTAAAGATACCATCGAAACCACTGA-3'  | 339  | chr13 | 22696898 | 22697206 |
| FlagMAQ_chr13:22688792-22981935.2 | 5'AGCGGATAACAATTTACACAGGAGGACGAGGAAGGCAGA-3'        | 5'-GTTTCTTGAAAGGACAGGCTGGAAATG-3'     | 218  | chr13 | 22761030 | 22761217 |
| FlagMAQ_chr13:22688792-22981935.3 | 5' AGCGGATAACAATTTACACAGGCTTGTTTCGGGAGTCATAAGTCA-3' | 5'-GTTTCTTCCTTTCAATTGTCAACAGCTA-3'    | 168  | chr13 | 22817621 | 22817758 |
| FlagMAQ_chr13:22688792-22981935.4 | 5'AGCGGATAACAATTTACACAGGTGCTTATCACTGAACCACAACC-3'   | 5'-GTTTCTTAATCACAAAGGAGCTAGAGGAATG-3' | 237  | chr13 | 22897279 | 22897485 |
| FlagMAQ_chr13:22688792-22981935.5 | 5'AGCGGATAACAATTTACACAGGGACTTCCAACACCACAACTAATG-3'  | 5'-GTTTCTTCTAGACACAGCTACCAATGC-3'     | 287  | chr13 | 22965582 | 22965838 |

## SKZ\_0092; loss 15q11

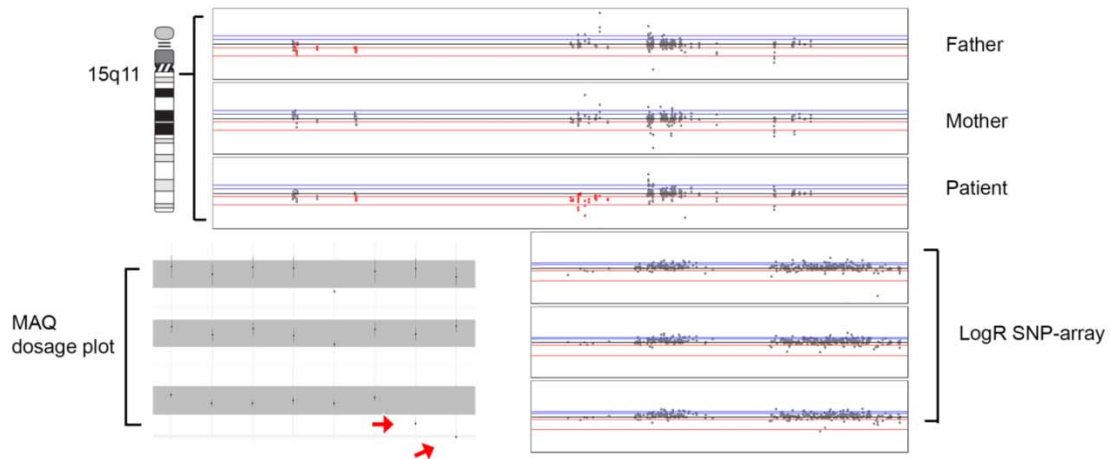

One polymorphism, in the 15q11 region was detected with WES-CN. In the upper panel red dots indicate loss, two MAQ assay probes (red arrow) inside the deleted region, confirm this loss. SNP-array resolution was not enough to call this loss. This is not one of the 167 rare CNVs.



## SKZ\_2111; Gain 16p13.3(chr16:14,985,615-17,000,304)

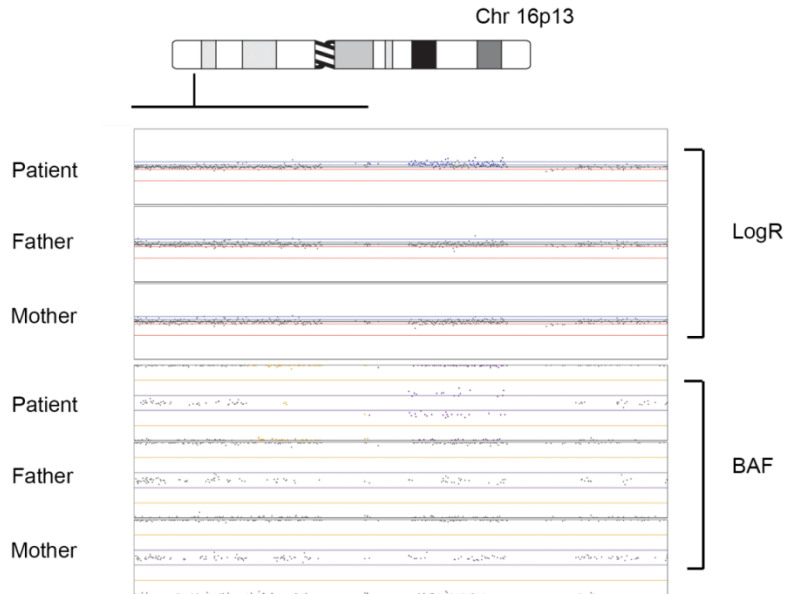

## SKZ\_2111 gain 16p13

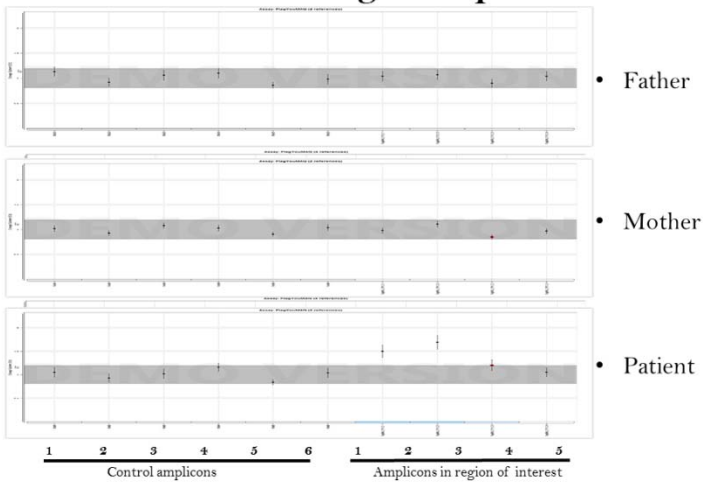

## Gain in HG19:

| Amplicon         | Forward primer                                   | Reverse primer                       | Size | Chr   | Start    | Stop     |
|------------------|--------------------------------------------------|--------------------------------------|------|-------|----------|----------|
| FlagMAQ_2111_2.1 | 5'AGCGGATAACAATTTACACAGGCAGGGAGACACCATGCAGA-3'   | 5'-GTTTCTTGGTATGATGAGAGAGGTGAAGGA-3' | 173  | chr16 | 15141570 | 15141712 |
| FlagMAQ_2111_2.2 | 5'AGCGGATAACAATTTACACAGGGTCGACCCTCCCAAACC-3'     | 5'-GTTTCTTGGCAATGGAAGATGAAGAGGA-3'   | 126  | chr16 | 15586155 | 15586250 |
| FlagMAQ_2111_2.3 | 5'AGCGGATAACAATTTACACAGGCTGGGTGAAGAGGCCAAAGT-3'  | 5'-GTTTCTTGGCCACCCTACAGACAGA-3'      | 134  | chr16 | 16061100 | 16061203 |
| FlagMAQ_2111_2.4 | 5'AGCGGATAACAATTTACACAGGTGGATGTGAGAAATGCCAAGT-3' | 5'-GTTTCTTGGAGGATGAGGAGCAAACC-3'     | 216  | chr16 | 16965277 | 16965462 |

**SKZ\_21q22.2; Gain 21q22.2 (chr21:40,095,493-40,160,135)**

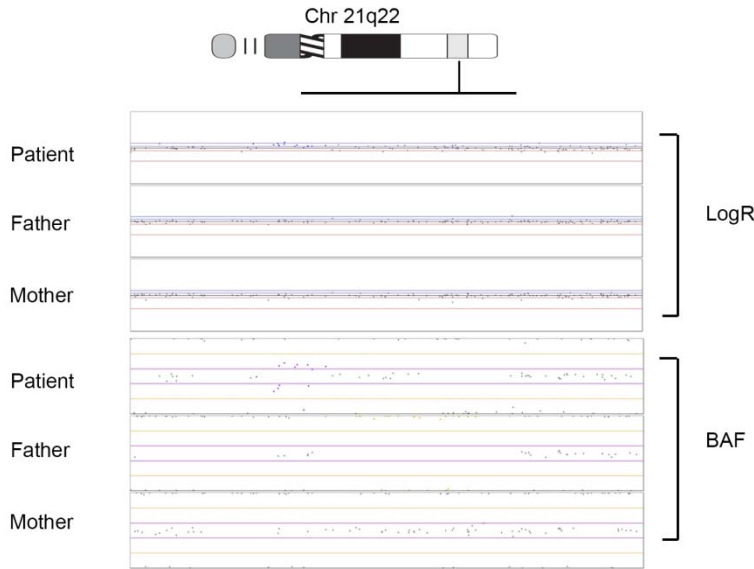

**SKZ\_1307 gain 21q22.2**

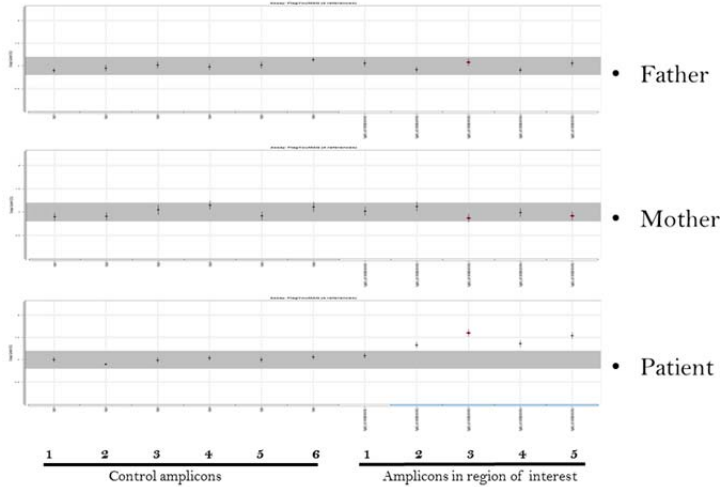

| Amplicon                          | Forward primer                                     | Reverse primer                       | Size | Chr.  | Start    | Stop     |
|-----------------------------------|----------------------------------------------------|--------------------------------------|------|-------|----------|----------|
| FlagMAQ_chr21:40100880-40154748.1 | 5'AGCGGATAACAATTCACACAGGAACCTCGCCTCTTGAACC-3'      | 5'-GTTTCTTAATTCCTCATCACATGGGTCA-3'   | 131  | chr21 | 40102211 | 40102311 |
| FlagMAQ_chr21:40100880-40154748.2 | 5'AGCGGATAACAATTCACACAGGCTCCAAATGCACTGAAATG-3'     | 5'-GTTTCTTAGGTGATAGAATGGGTGCTCTTA-3' | 271  | chr21 | 40117025 | 40117265 |
| FlagMAQ_chr21:40100880-40154748.3 | 5'AG CGGATAACAATTCACACAGGCAGGCAGACAGCTCACGTT-3'    | 5'-GTTTCTTAGAGAGGCACAGGCACAGA-3'     | 100  | chr21 | 40125236 | 40125305 |
| FlagMAQ_chr21:40100880-40154748.4 | 5'AGCGGATAACAATTCACACAGGCTGCAAAATACAGTGCAAACTGA-3' | 5'-GTTTCTTTCTCCATCACITTTCTTAACTTC-3' | 122  | chr21 | 40144161 | 40144252 |
| FlagMAQ_chr21:40100880-40154748.5 | 5'AGCGGATAACAATTCACACAGGCAGAGAGCAACAAACAATGC-3'    | 5'-GTTTCTTGCTGTGGTGATGAGGGCTA-3'     | 110  | chr21 | 40154178 | 40154257 |
