# Supplementary material
Source: PubMed Central journal article supplement (PMC5117935)
Supplement: ejhg201686x4.pdf [file ejhg201686x4.pdf]

**Supplementary Table 1 Genomic coordinates and patient phenotypes of rare overlapping inherited CNVs**

| Internal          | Type | Chr | Cytoband        | Chromosome region HG19    | Length  | Genes affected               | Inheritance     | Classification                |
|-------------------|------|-----|-----------------|---------------------------|---------|------------------------------|-----------------|-------------------------------|
| SKZ_1112          | Gain | 3   | p14.1           | chr3:64992802-65051455    | 58653   | <i>ADAMTS9-AS2, BC040632</i> | no parental DNA | Uncertain                     |
| SKZ_0999          | Gain | 3   | p14.1           | chr3:64993928-65024494    | 30566   | <i>ADAMTS9-AS2</i>           | maternal        | Uncertain : likely benign     |
| DE82OSOUKBD100013 | Loss | 8   | p23.2           | chr8:3619348-3650542      | 31195   | <i>CSMD1</i>                 | undetermined    | Benign                        |
| DE27OSOUKBD100324 | Loss | 8   | p23.2           | chr8:4323965-4359306      | 35342   | <i>CSMD1</i>                 | undetermined    | Benign                        |
| DE37OSOUKBD100144 | Loss | 9   | p24.1           | chr9:8802640-8836439      | 33800   | <i>PTPRD</i>                 | undetermined    | Uncertain- likely benign      |
| DE60OSOUKBD100312 | Loss | 9   | p23             | chr9:9919638-9990269      | 70632   | <i>PTPRD</i>                 | undetermined    | Uncertain- likely benign      |
| DE63OSOUKBD100161 | Gain | 9   | q34.3           | chr9:138147997-138238503  | 90507   | <i>C9orf62</i>               | undetermined    | Benign                        |
| DE63OSOUKBD100161 | Gain | 9   | q34.3           | chr9:138147997-138238503  | 90507   | <i>C9orf62</i>               | undetermined    | Benign                        |
| DE14OSOUKBD100461 | Loss | 10  | p12.33          | chr10:18550958-18592873   | 41916   | <i>CACNB2</i>                | undetermined    | Uncertain                     |
| DE37OSOUKBD100047 | Loss | 10  | p12.33          | chr10:18550958-18583866   | 32909   | <i>CACNB2</i>                | undetermined    | Uncertain                     |
| SKZ_0773          | Loss | 11  | q22.1           | chr11:99497530-99583304   | 85774   | <i>CNTN5</i>                 | undetermined    | Benign                        |
| DE43OSOUKBD100133 | Loss | 11  | q22.1           | chr11:99519242-99568648   | 49407   | <i>CNTN5</i>                 | undetermined    | Benign                        |
| DE76OSOUKBD100315 | Loss | 11  | q22.1           | chr11:99519242-99568648   | 49407   | <i>CNTN5</i>                 | undetermined    | Benign                        |
| SKZ_1432          | Loss | 11  | q22.1           | chr11:99519242-99568648   | 49406   | <i>CNTN5</i>                 | no parental DNA | Benign                        |
| DE35OSOUKBD100471 | Gain | 12  | q24.12 - q24.13 | chr12:112183225-112327166 | 143942  | <i>ACAD10- MAPKAPK5</i>      | undetermined    | Benign                        |
| SKZ_1516          | Gain | 12  | q24.12          | chr12:112183225-112327166 | 143941  | <i>ACAD10- MAPKAPK5</i>      | maternal        | Benign                        |
| 148-04-01         | Gain | 12  | q24.12          | chr12:112183921-112318246 | 134325  | <i>ACAD10- MAPKAPK5</i>      | maternal        | Benign                        |
| SKZ_1976          | Gain | 13  | q31.3           | chr13:92958981-93035128   | 76147   | <i>GPC5</i>                  | maternal        | Benign                        |
| SKZ_1746          | Gain | 13  | q31.3           | chr13:92979291-93049171   | 69880   | <i>GPC5</i>                  | maternal        | Benign                        |
| DE44OSOUKBD100309 | Gain | 15  | q26.3           | chr15:102325461-102373183 | 47723   | <i>OR4F6, OR4F15</i>         | undetermined    | Benign                        |
| DE76OSOUKBD100315 | Gain | 15  | q26.3           | chr15:102332446-102368280 | 35835   | <i>OR4F6, OR4F15</i>         | undetermined    | Benign                        |
| SKZ_2111          | Gain | 16  | p13.11          | chr16:14985615-17000304   | 2014689 | <i>NOMO1-NPIP</i>            | <i>de novo</i>  | Uncertain : likely pathogenic |
| SKZ_1988          | Gain | 16  | p13.11          | chr16:15034035-15998820   | 964785  | <i>NPIP-FOPNL</i>            | paternal        | Uncertain                     |
| SKZ_1150          | Gain | 16  | p13.11          | chr16:15539023-16291541   | 752518  | <i>C16ORF45-ABCC6</i>        | paternal        | Uncertain                     |
| DE45OSOUKBD100291 | Loss | 16  | q24.1           | chr16:84429584-84490643   | 61060   | <i>ATP2C2</i>                | undetermined    | Benign                        |
| SKZ_1500          | Loss | 16  | q24.1           | chr16:84435058-84470476   | 35418   | <i>ATP2C2, KIAA0703</i>      | maternal        | Benign                        |
| DE94OSOUKBD100282 | Gain | X   | p22.33          | chrX:370599-612414        | 241816  | <i>SHOX</i>                  | undetermined    | Uncertain- likely benign      |
| SKZ_1508          | Gain | X   | p22.33          | chrX:405941-596245        | 218468  | <i>SHOX</i>                  | maternal        | Uncertain- likely benign      |
| SKZ_0374          | Gain | X   | p22.33          | chrX:407015-1008051       | 788690  | <i>SHOX</i>                  | maternal        | Uncertain- likely benign      |

| <b>Casenr</b>     | <b>Gender</b> | <b>Major anomalies</b>                                                                                                                       |
|-------------------|---------------|----------------------------------------------------------------------------------------------------------------------------------------------|
| SKZ_1112          | M             | EA                                                                                                                                           |
| SKZ_0999          | M             | EA/TEF                                                                                                                                       |
| DE82OSOUKBD100013 | F             | EA, developmental delay                                                                                                                      |
| DE27OSOUKBD100324 | F             | EA, Atrial septum defect I, tracheomalacia                                                                                                   |
| DE37OSOUKBD100144 | M             | EA                                                                                                                                           |
| DE60OSOUKBD100312 | F             | EA, alopecia, Cafe-au-lait spots, eye anomalies                                                                                              |
| DE63OSOUKBD100161 | F             | EA, vesicourethral reflux, PUV                                                                                                               |
| DE14OSOUKBD100461 | F             | EA                                                                                                                                           |
| DE37OSOUKBD100047 | M             | EA, tracheomalacia                                                                                                                           |
| SKZ_0773          | F             | EA/TEF, vertebral anomalies, anal , genital and ear anomalies, renal anomalies, upper limb anomalies, cleft lip+jaw+palate, duodenal atresia |
| DE43OSOUKBD100133 | F             | EA, brochial anomalies                                                                                                                       |
| DE76OSOUKBD100315 | F             | EA, lung anomalies                                                                                                                           |
| SKZ_1432          | M             | EA/TEF, anal anomalies, renal anomalies, urethral fistula and atresia, genital anomalies                                                     |
| DE35OSOUKBD100471 | M             | Esophageal stenosis, achalasia                                                                                                               |
| SKZ_1516          | F             | EA/TEF, ventricular septal defect, right sided aortic arch                                                                                   |
| 148-04-01         | F             | TEF, ventricular septal defect, anal atresia and vertebral anomalies                                                                         |
| SKZ_1976          | M             | EA/TEF, tracheo-laryngomalacia                                                                                                               |
| SKZ_1746          | M             | EA/TEF                                                                                                                                       |
| DE44OSOUKBD100309 | F             | EA, tracheomalacia                                                                                                                           |
| DE76OSOUKBD100315 | F             | EA, lung anomalies                                                                                                                           |
| SKZ_2111          | M             | TEF, anal anomaly, multiple VSDs, hypospadias                                                                                                |
| SKZ_1988          | F             | EA/TEF, anal anomalies,                                                                                                                      |
| SKZ_1150          | F             | EA/TEF + Atrio-ventricular septal defect                                                                                                     |
| DE45OSOUKBD100291 | F             | EA, hypoplastic thumb, Atrial septum defect II, kidney anomalies, tracheomalacia                                                             |
| SKZ_1500          | F             | EA/TEF, anorectal anomaly,                                                                                                                   |
| DE94OSOUKBD100282 | M             | EA, tracheomalacia, scoliosis, undescended testicle                                                                                          |
| SKZ_1508          | M             | EA/TEF, upper limb anomalies Atrial septum defect, dysmorphisms                                                                              |
