# Supplementary material
Source: PubMed Central journal article supplement (PMC5117935)
Supplement: ejhg201686x5.pdf [file ejhg201686x5.pdf]

| Internal          | Type | Chr | Cytoband       | Chromosome region HG19   | Length   | Inheritance                | CNV-frequency cohort | multiple | ISCA                         | DGV database web             | ClinGen CNV (likely) benign | Control group developmental delay | Authors classification       |
|-------------------|------|-----|----------------|--------------------------|----------|----------------------------|----------------------|----------|------------------------------|------------------------------|-----------------------------|-----------------------------------|------------------------------|
| 148-13-01         | Loss | 1   | q24.2          | chr1:168441289-168697617 | 256328   | Inheritance - Maternal     | 0.000                | -        | no comparable CNVs           | no comparable CNVs           | no comparable CNVs          | no comparable CNVs                | Uncertain- likely benign     |
| SKZ_1545          | Loss | 1   | q25.2          | chr1:178806664-181082264 | 2275600  | Inheritance - Paternal     | 0.000                | -        | no comparable CNVs           | no comparable CNVs           | no comparable CNVs          | no comparable CNVs                | Uncertain- likely benign     |
| DE80SOUKBD100074  | Gain | 1   | q43            | chr1:241155581-241186738 | 31158    | Inheritance - Undetermined | 0.000                | -        | no comparable CNVs           | no comparable CNVs           | no comparable CNVs          | no comparable CNVs                | Uncertain- likely benign     |
| DE80SOUKBD100480  | Gain | 1   | q44            | chr1:246256444-246700236 | 443793   | Inheritance - Undetermined | 0.000                | -        | Benign                       | Benign                       | no comparable CNVs          | no comparable CNVs                | Uncertain- likely benign     |
| SKZ_1840          | Loss | 1   | q32.3          | chr1:213092201-213176992 | 84791    | No parental DNA available  | 0.000                | -        | no comparable CNVs           | no comparable CNVs           | no comparable CNVs          | no comparable CNVs                | Uncertain                    |
| DE21OSOUKBD100141 | Gain | 2   | q21.1          | chr2:131485402-132024166 | 538765   | Inheritance - de novo      | 0.000                | -        | Uncertain                    | Uncertain- likely benign     | Uncertain- likely benign    | Uncertain- likely benign          | Uncertain- likely benign     |
| SKZ_0708          | Loss | 2   | q22.1          | chr2:137827978-138371164 | 543186   | Inheritance - Maternal     | 0.000                | -        | Uncertain- likely benign     | Uncertain- likely benign     | no comparable CNVs          | no comparable CNVs                | Uncertain- likely benign     |
| DE82SOUKBD100013  | Gain | 2   | q14.2          | chr2:121588391-121754337 | 165947   | Inheritance - Undetermined | 0.000                | -        | Uncertain- likely pathogenic | Uncertain- likely benign     | no comparable CNVs          | no comparable CNVs                | Uncertain- likely benign     |
| SKZ_2051          | Loss | 2   | q23.1          | chr2:149089645-149192958 | 103313   | Inheritance - Paternal     | 0.000                | -        | no comparable CNVs           | Benign                       | no comparable CNVs          | no comparable CNVs                | Uncertain- likely benign     |
| DE69SOUKBD100150  | Loss | 2   | q21.2          | chr2:133927604-133963658 | 36055    | Inheritance - Undetermined | 0.000                | -        | no comparable CNVs           | Benign                       | no comparable CNVs          | no comparable CNVs                | Benign                       |
| SKZ_0739          | Loss | 2   | p22.1          | chr2:39982433-40037717   | 55284    | Inheritance - Maternal     | 0.000                | -        | no comparable CNVs           | no comparable CNVs           | no comparable CNVs          | no comparable CNVs                | Uncertain- likely benign     |
| SKZ_1307          | Gain | 2   | p16.1          | chr2:56277274-56381718   | 104444   | Inheritance - Paternal     | 0.000                | -        | Uncertain                    | Benign                       | no comparable CNVs          | no comparable CNVs                | Benign                       |
| DE54SOUKBD100323  | Gain | 2   | q37.1          | chr2:233181492-233325849 | 144358   | Inheritance - Undetermined | 0.000                | -        | Benign                       | Benign                       | no comparable CNVs          | no comparable CNVs                | Uncertain- likely benign     |
| SKZ_0832          | Gain | 2   | p16.1          | chr2:61271844-61368778   | 96934    | Inheritance - Paternal     | 0.000                | -        | no comparable CNVs           | no comparable CNVs           | Benign                      | Benign                            | Uncertain- likely benign     |
| SKZ_1381          | Gain | 2   | p12            | chr2:27199019-27249536   | 50517    | Inheritance - Maternal     | 0.000                | -        | no comparable CNVs           | Uncertain- likely benign     | Benign                      | no comparable CNVs                | Uncertain- likely benign     |
| SKZ_1780          | Loss | 2   | p12            | chr2:78306103-78697833   | 391730   | Inheritance - Maternal     | 0.000                | -        | Uncertain- likely benign     | Benign                       | Uncertain- likely benign    | Uncertain- likely benign          | Benign                       |
| SKZ_0887          | Loss | 2   | q37.1          | chr2:231012029-231089979 | 77950    | Inheritance - Paternal     | 0.000                | -        | Uncertain                    | no comparable CNVs           | no comparable CNVs          | no comparable CNVs                | Uncertain- likely benign     |
| SKZ_2051          | Gain | 2   | q35            | chr2:218647714-219053933 | 406219   | Inheritance - Maternal     | 0.000                | -        | no comparable CNVs           | no comparable CNVs           | no comparable CNVs          | no comparable CNVs                | Uncertain                    |
| DE61OSOUKBD100197 | Gain | 2   | q13            | chr2:11186302-113273657  | 2087356  | Inheritance - Undetermined | 0.000                | -        | Uncertain- likely benign     | Uncertain                    | Benign                      | Uncertain- likely pathogenic      | Uncertain- likely pathogenic |
| SKZ_0999          | Gain | 3   | p14.1          | chr3:64993928-65024494   | 30566    | Inheritance - Maternal     | 0.000                | 1        | no comparable CNVs           | no comparable CNVs           | no comparable CNVs          | no comparable CNVs                | Uncertain- likely benign     |
| DE62SOUKBD100179  | Loss | 3   | q22.2          | chr3:134978716-135053549 | 74834    | Inheritance - Undetermined | 0.000                | -        | no comparable CNVs           | Benign                       | Uncertain- likely benign    | no comparable CNVs                | Uncertain- likely benign     |
| DE26SOUKBD100342  | Loss | 3   | p14.2          | chr3:62955270-62998884   | 43615    | Inheritance - Undetermined | 0.000                | -        | no comparable CNVs           | Benign                       | no comparable CNVs          | Benign                            | Benign                       |
| SKZ_1112          | Gain | 3   | p14.1          | chr3:64992802-65051455   | 58653    | No parental DNA available  | 0.000                | 1        | no comparable CNVs           | no comparable CNVs           | no comparable CNVs          | no comparable CNVs                | Uncertain                    |
| DE07OSOUKBD100005 | Loss | 3   | p12.3          | chr3:76848167-76951689   | 103523   | Inheritance - Undetermined | 0.000                | -        | Uncertain                    | Benign                       | no comparable CNVs          | no comparable CNVs                | Uncertain- likely benign     |
| SKZ_0374          | Gain | 3   | q13.13         | chr3:108616806-109014594 | 397788   | Inheritance - Paternal     | 0.000                | -        | no comparable CNVs           | Uncertain- likely benign     | no comparable CNVs          | Uncertain- likely benign          | Uncertain- likely benign     |
| DE92SOUKBD100221  | Loss | 3   | p12.1          | chr3:85561190-85612793   | 51604    | Inheritance - Undetermined | 0.000                | -        | Benign                       | Benign                       | no comparable CNVs          | no comparable CNVs                | Benign                       |
| SKZ_1416          | Gain | 3   | p12.3 - p12.2  | chr3:80453558-83463345   | 3009787  | Inheritance - Maternal     | 0.000                | -        | Uncertain                    | no comparable CNVs           | Uncertain- likely benign    | Uncertain- likely benign          | Benign                       |
| DE12OSOUKBD100206 | Gain | 3   | p26.1          | chr3:8520585-8552850     | 32266    | Inheritance - de novo      | 0.000                | -        | Uncertain                    | Uncertain- likely benign     | Uncertain- likely benign    | Uncertain- likely benign          | Uncertain                    |
| SKZ_2032          | Gain | 3   | p12.1          | chr3:86387381-86615770   | 228389   | Inheritance - Maternal     | 0.000                | -        | Uncertain                    | no comparable CNVs           | no comparable CNVs          | no comparable CNVs                | Uncertain- likely benign     |
| SKZ_0367          | Gain | 3   | q22.1          | chr3:133034333-133089757 | 55424    | No parental DNA available  | 0.000                | -        | no comparable CNVs           | no comparable CNVs           | no comparable CNVs          | no comparable CNVs                | Uncertain                    |
| DE62SOUKBD100179  | Gain | 4   | q32.1          | chr4:156745682-157287454 | 541773   | Inheritance - Undetermined | 0.000                | -        | no comparable CNVs           | Uncertain- likely benign     | no comparable CNVs          | Uncertain- likely benign          | Uncertain- likely benign     |
| SKZ_1523          | Gain | 4   | p15.32         | chr4:16922258-17800667   | 878409   | No parental DNA available  | 0.000                | -        | no comparable CNVs           | Uncertain- likely benign     | no comparable CNVs          | Uncertain- likely benign          | Uncertain- likely benign     |
| DE53SOUKBD100147  | Loss | 4   | q13.2          | chr4:69668636-69713519   | 44684    | Inheritance - Undetermined | 0.000                | -        | no comparable CNVs           | Benign                       | no comparable CNVs          | no comparable CNVs                | Uncertain- likely benign     |
| SKZ_1002          | Loss | 4   | p16.1          | chr4:7696394-7760459     | 64065    | Inheritance - Paternal     | 0.000                | -        | no comparable CNVs           | Uncertain- likely benign     | no comparable CNVs          | no comparable CNVs                | Uncertain- likely benign     |
| SKZ_1248          | Gain | 4   | q35.2          | chr4:187540292-187849681 | 309389   | Inheritance - Maternal     | 0.000                | -        | Uncertain                    | Uncertain                    | Uncertain- likely benign    | Uncertain                         | Uncertain- likely pathogenic |
| DE08SOUKBD100138  | Loss | 4   | q28.1          | chr4:125251081-128286629 | 3035549  | Inheritance - Undetermined | 0.000                | -        | Pathogenic                   | Pathogenic                   | no comparable CNVs          | no comparable CNVs                | Uncertain- likely benign     |
| DE69SOUKBD100150  | Gain | 5   | q35.1          | chr5:171395554-171508587 | 113034   | Inheritance - Undetermined | 0.000                | -        | no comparable CNVs           | no comparable CNVs           | no comparable CNVs          | no comparable CNVs                | Uncertain- likely benign     |
| DE11OSOUKBD100224 | Gain | 5   | q23.1          | chr5:120513455-120921346 | 407892   | Inheritance - Undetermined | 0.000                | -        | no comparable CNVs           | Uncertain- likely benign     | no comparable CNVs          | no comparable CNVs                | Uncertain- likely benign     |
| SKZ_0255          | Loss | 5   | q31.1          | chr5:131145181-131266601 | 121420   | Inheritance - Undetermined | 0.000                | -        | no comparable CNVs           | Uncertain- likely benign     | no comparable CNVs          | no comparable CNVs                | Uncertain- likely benign     |
| SKZ_1925          | Gain | 5   | p14.1          | chr5:25017057-25426009   | 408952   | Inheritance - Undetermined | 0.000                | -        | no comparable CNVs           | Uncertain- likely benign     | no comparable CNVs          | no comparable CNVs                | Uncertain- likely benign     |
| SKZ_1248          | Gain | 5   | p15.1          | chr5:16652934-16771046   | 118112   | Inheritance - Maternal     | 0.000                | -        | no comparable CNVs           | no comparable CNVs           | no comparable CNVs          | no comparable CNVs                | Uncertain- likely benign     |
| SKZ_1453          | Gain | 5   | q12.1          | chr5:59718323-59752640   | 34317    | Inheritance - Maternal     | 0.000                | -        | no comparable CNVs           | Benign                       | Uncertain- likely benign    | Benign                            | Benign                       |
| SKZ_1800          | Gain | 5   | p15.31 - p15.2 | chr5:7198626-8305678     | 1107054  | Inheritance - Maternal     | 0.000                | -        | Uncertain                    | Uncertain                    | no comparable CNVs          | Uncertain- likely benign          | Uncertain- likely benign     |
| SKZ_1032          | Loss | 5   | q11.2          | chr5:53784524-54985838   | 1201314  | Inheritance - Paternal     | 0.000                | -        | Uncertain                    | no comparable CNVs           | no comparable CNVs          | no comparable CNVs                | Uncertain- likely benign     |
| DE85SOUKBD100056  | Gain | 6   | q16.3          | chr6:101950970-102062025 | 111056   | Inheritance - Undetermined | 0.000                | -        | no comparable CNVs           | no comparable CNVs           | Uncertain- likely benign    | no comparable CNVs                | Uncertain- likely benign     |
| DE53SOUKBD100050  | Gain | 6   | q26            | chr6:162201050-162260159 | 59110    | Inheritance - Undetermined | 0.000                | -        | no comparable CNVs           | Benign                       | no comparable CNVs          | no comparable CNVs                | Benign                       |
| DE61OSOUKBD100294 | Loss | 6   | p21.33         | chr6:31969589-32007227   | 37639    | Inheritance - Undetermined | 0.000                | -        | Uncertain- likely benign     | Benign                       | Benign                      | Benign                            | Benign                       |
| DE11OSOUKBD100127 | Gain | 6   | p21.31         | Chr6:35285720-35434273   | 148554   | Inheritance - Maternal     | 0.000                | -        | no comparable CNVs           | no comparable CNVs           | no comparable CNVs          | no comparable CNVs                | Uncertain- likely benign     |
| SKZ_1506          | Loss | 6   | q23.2          | chr6:134730991-135020544 | 289553   | Inheritance - Paternal     | 0.000                | -        | no comparable CNVs           | no comparable CNVs           | no comparable CNVs          | no comparable CNVs                | Uncertain- likely benign     |
| SKZ_1856          | Loss | 6   | p22.3          | chr6:20884837-21082258   | 197421   | No parental DNA available  | 0.000                | -        | no comparable CNVs           | Uncertain- likely pathogenic | no comparable CNVs          | no comparable CNVs                | Uncertain- likely pathogenic |
| 148-16-01         | Loss | 7   | q34            | chr7:142825643-142890809 | 65166    | Inheritance - Maternal     | 0.000                | -        | no comparable CNVs           | Benign                       | no comparable CNVs          | Benign                            | Uncertain- likely benign     |
| SKZ_1174          | Gain | 7   | q35            | chr7:143342375-143913713 | 571338   | Inheritance - Maternal     | 0.000                | -        | Benign                       | Benign                       | no comparable CNVs          | no comparable CNVs                | Benign                       |
| SKZ_1662          | Gain | 7   | q36.3          | chr7:157730598-157826278 | 95680    | Inheritance - Paternal     | 0.000                | -        | Uncertain- likely benign     | Benign                       | Uncertain- likely benign    | Uncertain- likely benign          | Benign                       |
| 148-17-01         | Loss | 7   | p22            | chr7:6123758-6139997     | 16239    | Inheritance - not Maternal | 0.000                | -        | Benign                       | Benign                       | Benign                      | no comparable CNVs                | Uncertain- likely benign     |
| DE20SOUKBD100450  | Loss | 7   | q21.13         | chr7:88645832-89092714   | 446833   | Inheritance - Undetermined | 0.000                | -        | Uncertain                    | Uncertain- likely benign     | no comparable CNVs          | Uncertain- likely benign          | Uncertain- likely benign     |
| SKZ_1035          | Gain | 7   | p12.1          | chr7:17243791-17590700   | 346909   | Inheritance - Paternal     | 0.000                | -        | Uncertain                    | Benign                       | Benign                      | Benign                            | Benign                       |
| SKZ_1035          | Gain | 7   | p14.1          | chr7:40156332-40204960   | 48628    | Inheritance - Paternal     | 0.000                | -        | no comparable CNVs           | Benign                       | no comparable CNVs          | no comparable CNVs                | Uncertain- likely benign     |
| SKZ_2111          | Loss | 7   | q35q36.3       | chr7:143839360-159138663 | 15299303 | Inheritance - de novo      | 0.000                | -        | Pathogenic                   | no comparable CNVs           | no comparable CNVs          | no comparable CNVs                | Pathogenic                   |
| DE82SOUKBD100013  | Loss | 8   | p23.2          | chr8:3619348-3650542     | 31195    | Inheritance - Undetermined | 0.000                | 2        | no comparable CNVs           | Uncertain- likely benign     | Benign                      | no comparable CNVs                | Benign                       |
| DE27OSOUKBD100324 | Loss | 8   | p23.2          | chr8:4323965-4359306     | 35342    | Inheritance - Undetermined | 0.000                | 2        | Uncertain- likely benign     | Uncertain- likely benign     | Benign                      | no comparable CNVs                | Benign                       |
| DE18OSOUKBD100098 | Loss | 8   | p23.1          | chr8:10447116-10504819   | 57704    | Inheritance - Undetermined | 0.000                | -        | no comparable CNVs           | Uncertain- likely benign     | Uncertain- likely benign    | no comparable CNVs                | Uncertain- likely benign     |
| DE92SOUKBD100221  | Loss | 8   | q13.3          | chr8:71608781-71646728   | 37948    | Inheritance - Undetermined | 0.000                | -        | Uncertain                    | Uncertain- likely benign     | no comparable CNVs          | no comparable CNVs                | Uncertain- likely benign     |
| SKZ_0426          | Gain | 8   | q24.3          | chr8:142438569-142482615 | 44046    | Inheritance - Maternal     | 0.000                | -        | no comparable CNVs           | no comparable CNVs           | Uncertain- likely benign    | Uncertain- likely benign          | Benign                       |
| SKZ_1923          | Gain | 8   | p23.3          | chr8:1445011-1797072     | 352061   | Inheritance - Paternal     | 0.000                | -        | no comparable CNVs           | Benign                       | Benign                      | Benign                            | Benign                       |
| SKZ_1810          | Gain | 8   | p22            | chr8:17592647-17859657   | 267010   | Inheritance - de novo      | 0.000                | -        | Uncertain- likely benign     | Uncertain- likely benign     | Uncertain- likely benign    | Uncertain- likely benign          | Uncertain- likely benign     |
| DE63SOUKBD100161  | Gain | 9   | q34.3          | chr9:138147997-138238503 | 90507    | Inheritance - Undetermined | 0.000                | 4        | Uncertain- likely benign     | Benign                       | Uncertain- likely benign    | Uncertain- likely benign          | Benign                       |
| DE63SOUKBD100161  | Gain | 9   | q34.3          | chr9:138147997-138238503 | 90507    | Inheritance - Undetermined | 0.000                | 4        | Uncertain- likely benign     | Benign                       | Benign                      | Uncertain- likely benign          | Benign                       |
| DE12OSOUKBD100303 | Gain | 9   | q34.2          | chr9:136850292-137153876 | 303585   | Inheritance - Undetermined | 0.000                | -        | no comparable CNVs           | Uncertain- likely benign     | Uncertain- likely benign    | no comparable CNVs                | Uncertain- likely benign     |
| DE37OSOUKBD100144 | Loss | 9   | p24.1          | chr9:8802640-8836439     | 33800    | Inheritance - Undetermined | 0.000                | 3        | no comparable CNVs           | no comparable CNVs           | no comparable CNVs          | no comparable CNVs                | Uncertain- likely benign     |
| DE60SOUKBD100312  | Loss | 9   | p23            | chr9:9919638-9990269     | 70632    | Inheritance - Undetermined | 0.000                | 3        | no comparable CNVs           | no comparable CNVs           | no comparable CNVs          | no comparable CNVs                | Uncertain- likely benign     |
| SKZ_1825          | Loss | 9   | p22.3          | chr9:15300542-15381614   | 81072    | Inheritance - Maternal     | 0.000                | -        | Uncertain- likely benign     | no comparable CNVs           | Uncertain- likely benign    | Uncertain- likely benign          | Benign                       |
| DE37OSOUKBD100047 | Loss | 10  | p12.33         | chr10:18550958-18583866  | 32909    | Inheritance - Undetermined | 0.000                | 5        | no comparable CNVs           | no comparable CNVs           | no comparable CNVs          | no comparable CNVs                | Uncertain- likely benign     |
| DE14OSOUKBD100461 | Loss | 10  | p12.33         | chr10:18550958-18592873  | 41916    | Inheritance - Undetermined | 0.000                | 5        | no comparable CNVs           | no comparable CNVs           | no comparable CNVs          | no comparable CNVs                | Uncertain- likely benign     |

| Internal          | Type | Chr | Cytoband        | Chromosome region HG19    | Length  | Inheritance                | CNV-frequency cohort | multiple | ISCA                         | DGV database web             | ClinGen CNV (likely) benign | Control group developmental delay | Authors classification       |
|-------------------|------|-----|-----------------|---------------------------|---------|----------------------------|----------------------|----------|------------------------------|------------------------------|-----------------------------|-----------------------------------|------------------------------|
| DE60OSOUKBD100118 | Gain | 11  | q22.1           | chr11:101397368-101472351 | 74984   | Inheritance - Undetermined | 0.000                | -        | no comparable CNVs           | Uncertain- likely benign     | no comparable CNVs          | Uncertain- likely benign          | Uncertain- likely benign     |
| SKZ_2039          | Gain | 11  | q22.3           | chr11:103971318-104028957 | 57639   | No parental DNA available  | 0.000                | -        | Uncertain                    | Uncertain- likely benign     | no comparable CNVs          | Uncertain- likely benign          | Uncertain- likely benign     |
| SKZ_2026          | Loss | 11  | p15.4           | chr11:1115899-1261163     | 145264  | No parental DNA available  | 0.000                | -        | no comparable CNVs           | Uncertain- likely benign     | no comparable CNVs          | Uncertain- likely benign          | Uncertain- likely benign     |
| DE63OSOUKBD100355 | Gain | 11  | p15.2           | chr11:14865608-14906548   | 40941   | Inheritance - Undetermined | 0.000                | -        | Uncertain                    | Uncertain- likely benign     | no comparable CNVs          | Uncertain- likely benign          | Uncertain- likely benign     |
| SKZ_1441          | Loss | 11  | p12             | chr11:40567422-40660470   | 93048   | Inheritance - Undetermined | 0.000                | -        | Benign                       | Uncertain- likely benign     | no comparable CNVs          | Uncertain- likely benign          | Uncertain- likely benign     |
| SKZ_1810          | Loss | 11  | p14.3           | chr11:21836986-22032466   | 195480  | Inheritance - de novo      | 0.000                | -        | Uncertain                    | Benign                       | no comparable CNVs          | Uncertain- likely benign          | Uncertain- likely benign     |
| SKZ_0773          | Loss | 11  | q22.1           | chr11:99497530-99583304   | 85774   | Inheritance - Undetermined | 0.001                | 6        | no comparable CNVs           | Benign                       | Benign                      | Uncertain- likely benign          | Benign                       |
| DE43OSOUKBD100133 | Loss | 11  | q22.1           | chr11:99519242-99568648   | 49407   | Inheritance - Undetermined | 0.001                | 6        | no comparable CNVs           | Benign                       | Benign                      | Uncertain- likely benign          | Benign                       |
| DE76OSOUKBD100315 | Loss | 11  | q22.1           | chr11:99519242-99568648   | 49407   | Inheritance - Undetermined | 0.001                | 6        | no comparable CNVs           | Benign                       | Benign                      | Uncertain- likely benign          | Benign                       |
| SKZ_1452          | Loss | 11  | q22.1           | chr11:99519242-99568648   | 49406   | No parental DNA available  | 0.001                | 6        | no comparable CNVs           | Benign                       | Benign                      | Uncertain- likely benign          | Benign                       |
| SKZ_0400          | Gain | 11  | q13.5           | chr11:76268060-76417696   | 149636  | Inheritance - Paternal     | 0.000                | -        | no comparable CNVs           | Uncertain                    | no comparable CNVs          | Uncertain- likely benign          | Uncertain- likely benign     |
| SKZ_1415          | Loss | 11  | q14.2 - q14.3   | chr11:87099219-91921385   | 4823166 | Inheritance - Maternal     | 0.000                | -        | Uncertain                    | no comparable CNVs           | no comparable CNVs          | no comparable CNVs                | Uncertain- likely benign     |
| SKZ_1855          | Gain | 11  | p15.4           | chr11:4371631-5253127     | 881496  | No parental DNA available  | 0.000                | -        | no comparable CNVs           | Benign                       | no comparable CNVs          | no comparable CNVs                | Uncertain- likely pathogenic |
| DE04OSOUKBD100156 | Gain | 12  | q24.11          | chr12:109549884-109667024 | 117141  | Inheritance - Undetermined | 0.000                | -        | Benign                       | Uncertain- likely benign     | Benign                      | Uncertain- likely benign          | Benign                       |
| DE35OSOUKBD100471 | Gain | 12  | q24.12 - q24.13 | chr12:112183225-112327166 | 143942  | Inheritance - Undetermined | 0.000                | 7        | Benign                       | Uncertain- likely benign     | Benign                      | Uncertain- likely benign          | Benign                       |
| SKZ_0999          | Gain | 12  | p13.2           | chr12:10423943-10552714   | 128771  | Inheritance - Maternal     | 0.000                | -        | no comparable CNVs           | Benign                       | no comparable CNVs          | Uncertain- likely benign          | Uncertain- likely benign     |
| SKZ_1845          | Gain | 12  | q24.31          | chr12:123596909-123989546 | 392637  | No parental DNA available  | 0.000                | -        | no comparable CNVs           | Benign                       | no comparable CNVs          | Uncertain- likely benign          | Uncertain- likely benign     |
| SKZ_0406          | Gain | 12  | q24.32          | chr12:127488730-127837052 | 348322  | Inheritance - Undetermined | 0.000                | -        | Uncertain- likely benign     | Uncertain- likely benign     | Uncertain- likely benign    | Uncertain- likely benign          | Uncertain- likely benign     |
| SKZ_0703          | Gain | 12  | q24.33          | chr12:133199668-133337730 | 137762  | Inheritance - Undetermined | 0.000                | -        | no comparable CNVs           | Uncertain- likely benign     | no comparable CNVs          | Uncertain- likely benign          | Uncertain- likely benign     |
| SKZ_1506          | Gain | 12  | p13.33          | chr12:706022-1125143      | 419121  | Inheritance - Undetermined | 0.000                | -        | Uncertain                    | Uncertain- likely benign     | no comparable CNVs          | Uncertain- likely benign          | Uncertain- likely benign     |
| SKZ_1516          | Gain | 12  | q24.12          | chr12:112183225-112327166 | 143941  | Inheritance - Maternal     | 0.000                | 7        | Benign                       | Benign                       | Benign                      | Uncertain- likely benign          | Benign                       |
| 148-04-01         | Gain | 12  | q24.12          | chr12:112183225-112327166 | 134325  | Inheritance - Maternal     | 0.000                | 7        | Benign                       | Benign                       | Benign                      | Uncertain- likely benign          | Benign                       |
| DE76OSOUKBD100315 | Gain | 12  | q22             | chr12:95530434-95627379   | 96946   | Inheritance - Undetermined | 0.000                | -        | no comparable CNVs           | Uncertain- likely benign     | no comparable CNVs          | Uncertain- likely benign          | Uncertain- likely benign     |
| SKZ_1301          | Gain | 12  | p13.31          | chr12:8069848-8101856     | 32008   | Inheritance - Maternal     | 0.000                | -        | Benign                       | Benign                       | Benign                      | Uncertain- likely benign          | Benign                       |
| SKZ_1790          | Loss | 12  | q21.31          | chr12:83765377-84013252   | 247875  | Inheritance - Maternal     | 0.000                | -        | no comparable CNVs           | Uncertain                    | no comparable CNVs          | Uncertain- likely benign          | Uncertain- likely benign     |
| DE93OSOUKBD100203 | Loss | 13  | q12.12          | chr13:23803922-23853233   | 49312   | Inheritance - Undetermined | 0.000                | -        | Uncertain                    | Benign                       | no comparable CNVs          | Uncertain- likely benign          | Uncertain- likely benign     |
| SKZ_1497          | Loss | 13  | q12.11          | chr13:19612306-19679872   | 67566   | Inheritance - Paternal     | 0.000                | -        | no comparable CNVs           | Uncertain- likely benign     | no comparable CNVs          | Uncertain- likely benign          | Uncertain- likely benign     |
| DE35OSOUKBD100471 | Gain | 13  | q14.11          | chr13:43146433-43187994   | 41562   | Inheritance - Undetermined | 0.000                | -        | no comparable CNVs           | Benign                       | no comparable CNVs          | Uncertain- likely benign          | Uncertain- likely benign     |
| DE67OSOUKBD100477 | Gain | 13  | q14.11          | chr13:44032193-44171911   | 139719  | Inheritance - Undetermined | 0.000                | -        | no comparable CNVs           | Benign                       | no comparable CNVs          | Uncertain- likely benign          | Uncertain- likely benign     |
| SKZ_0876          | Loss | 13  | q12.3           | chr13:29714684-29828112   | 113428  | Inheritance - Paternal     | 0.000                | -        | no comparable CNVs           | Benign                       | no comparable CNVs          | Uncertain- likely benign          | Uncertain- likely benign     |
| SKZ_1840          | Loss | 13  | q31.1           | chr13:85909019-86064348   | 155329  | No parental DNA available  | 0.000                | -        | Uncertain                    | Benign                       | no comparable CNVs          | Uncertain- likely benign          | Uncertain- likely benign     |
| SKZ_1746          | Loss | 13  | q21.31          | chr13:64295459-64400173   | 104714  | Inheritance - Paternal     | 0.000                | -        | Uncertain- likely benign     | Benign                       | Uncertain- likely benign    | Uncertain- likely benign          | Benign                       |
| SKZ_1976          | Gain | 13  | q31.3           | chr13:92958981-93035128   | 76147   | Inheritance - Maternal     | 0.000                | 8        | no comparable CNVs           | Benign                       | no comparable CNVs          | Uncertain- likely benign          | Uncertain- likely benign     |
| SKZ_1746          | Gain | 13  | q31.3           | chr13:92979291-93049171   | 69880   | Inheritance - Maternal     | 0.000                | 8        | no comparable CNVs           | Benign                       | no comparable CNVs          | Uncertain- likely benign          | Uncertain- likely benign     |
| SKZ_1662          | Loss | 13  | q12.11          | chr13:22688792-22981935   | 293143  | Inheritance - de novo      | 0.000                | -        | no comparable CNVs           | Benign                       | no comparable CNVs          | Uncertain- likely benign          | Uncertain                    |
| DE91OSOUKBD100336 | Gain | 14  | q11.2           | chr14:21353205-21421877   | 68673   | Inheritance - Undetermined | 0.000                | -        | no comparable CNVs           | Uncertain                    | no comparable CNVs          | Uncertain- likely benign          | Uncertain- likely benign     |
| DE86OSOUKBD100232 | Gain | 14  | q12             | chr14:24947323-24986166   | 38844   | Inheritance - Undetermined | 0.000                | -        | no comparable CNVs           | Uncertain- likely benign     | no comparable CNVs          | Uncertain- likely benign          | Uncertain- likely benign     |
| DE92OSOUKBD100221 | Loss | 14  | q21.2           | chr14:44928342-45378475   | 450134  | Inheritance - Undetermined | 0.000                | -        | Uncertain                    | Benign                       | Benign                      | Uncertain- likely benign          | Benign                       |
| DE14OSOUKBD100461 | Loss | 15  | q21.3           | chr15:57711740-57749246   | 37507   | Inheritance - Undetermined | 0.000                | -        | no comparable CNVs           | Benign                       | no comparable CNVs          | no comparable CNVs                | Uncertain- likely benign     |
| DE44OSOUKBD100309 | Gain | 15  | q26.3           | chr15:102325461-102373183 | 47723   | Inheritance - Undetermined | 0.000                | 9        | Uncertain- likely benign     | Benign                       | Benign                      | Uncertain- likely benign          | Benign                       |
| DE76OSOUKBD100315 | Gain | 15  | q26.3           | chr15:102332446-102368280 | 35835   | Inheritance - Undetermined | 0.000                | 9        | Uncertain- likely benign     | Benign                       | Benign                      | Uncertain- likely benign          | Benign                       |
| SKZ_2032          | Loss | 15  | q11.2           | chr15:22665220-23147419   | 482199  | Inheritance - not Maternal | 0.000                | -        | Uncertain                    | Benign                       | Benign                      | Uncertain- likely benign          | Benign                       |
| SKZ_0845          | Gain | 15  | q21.3           | chr15:55354493-55956320   | 601827  | Inheritance - Maternal     | 0.000                | -        | Uncertain                    | Benign                       | no comparable CNVs          | Uncertain- likely benign          | Uncertain- likely benign     |
| SKZ_1500          | Loss | 15  | q24.2 - q24.3   | chr15:76524284-76625437   | 101153  | Inheritance - Maternal     | 0.000                | -        | no comparable CNVs           | Uncertain- likely benign     | no comparable CNVs          | Uncertain- likely benign          | Uncertain- likely benign     |
| SKZ_0856          | Loss | 15  | q13.3           | chr15:32457092-32771537   | 314445  | Inheritance - Paternal     | 0.000                | -        | Uncertain- likely pathogenic | Pathogenic                   | no comparable CNVs          | Uncertain- likely benign          | Uncertain- likely pathogenic |
| DE62OSOUKBD100179 | Gain | 16  | q12.1 - q12.2   | chr16:52464934-52676323   | 211390  | Inheritance - Undetermined | 0.000                | -        | no comparable CNVs           | Uncertain                    | no comparable CNVs          | Uncertain- likely benign          | Uncertain- likely benign     |
| SKZ_1150          | Gain | 16  | p13.11          | chr16:15539023-16291541   | 752518  | Inheritance - Paternal     | 0.000                | 10       | Uncertain                    | Uncertain                    | Uncertain- likely benign    | Uncertain- likely benign          | Uncertain- likely pathogenic |
| SKZ_1988          | Gain | 16  | p13.11          | chr16:15034035-1598820    | 964785  | Inheritance - Paternal     | 0.000                | 10       | Uncertain                    | Uncertain                    | Uncertain- likely benign    | Uncertain- likely benign          | Uncertain- likely pathogenic |
| SKZ_1381          | Gain | 16  | p13.2           | chr16:7303708-7357294     | 53586   | Inheritance - Paternal     | 0.000                | -        | no comparable CNVs           | Benign                       | no comparable CNVs          | Uncertain- likely benign          | Uncertain- likely benign     |
| SKZ_0680          | Loss | 16  | q23.2           | chr16:81234781-81287239   | 52458   | Inheritance - Maternal     | 0.000                | -        | Uncertain- likely benign     | Benign                       | Uncertain- likely benign    | Uncertain- likely benign          | Benign                       |
| DE45OSOUKBD100291 | Loss | 16  | q24.1           | chr16:84429584-84490643   | 61060   | Inheritance - Undetermined | 0.000                | 11       | no comparable CNVs           | Benign                       | no comparable CNVs          | Uncertain- likely benign          | Benign                       |
| SKZ_1500          | Loss | 16  | q24.1           | chr16:84435058-84470476   | 35418   | Inheritance - Maternal     | 0.000                | 11       | no comparable CNVs           | Benign                       | no comparable CNVs          | Uncertain- likely benign          | Uncertain- likely benign     |
| DE52OSOUKBD100262 | Gain | 16  | q24.2           | chr16:87738873-87812644   | 73772   | Inheritance - Undetermined | 0.000                | -        | Uncertain                    | Uncertain- likely benign     | no comparable CNVs          | Uncertain- likely benign          | Uncertain- likely benign     |
| SKZ_2111          | Gain | 16  | p13.11          | chr16:14985615-17000304   | 2014689 | Inheritance - de novo      | 0.000                | 10       | Uncertain                    | Uncertain- likely pathogenic | Uncertain- likely benign    | Uncertain- likely benign          | Uncertain- likely pathogenic |
| DE08OSOUKBD100084 | Loss | 17  | p11.2           | chr17:17316541-17349835   | 33295   | Inheritance - Undetermined | 0.000                | -        | no comparable CNVs           | Benign                       | Benign                      | Uncertain- likely benign          | Benign                       |
| SKZ_2032          | Loss | 17  | p11.2           | chr17:19417785-19579313   | 161528  | Inheritance - not Maternal | 0.000                | -        | Benign                       | Benign                       | Uncertain- likely benign    | no comparable CNVs                | Uncertain- likely benign     |
| DE13OSOUKBD100285 | Loss | 17  | p11.2           | chr17:20051012-20592172   | 541161  | Inheritance - Undetermined | 0.000                | -        | Uncertain- likely benign     | Uncertain- likely benign     | Uncertain- likely benign    | Uncertain- likely benign          | Uncertain- likely benign     |
| DE89OSOUKBD100081 | Loss | 17  | p13.2           | chr17:3505638-3559746     | 54109   | Inheritance - Undetermined | 0.000                | -        | Benign                       | Benign                       | no comparable CNVs          | Benign                            | Benign                       |

| Internal          | Type        | Chr | Cytoband | Chromosome region HG19   | Length  | Inheritance                | CNV-frequency cohort | multiple | ISCA                     | DGV database web         | ClinGen CNV (likely) benign | Control group developmental delay | Authors classification       |
|-------------------|-------------|-----|----------|--------------------------|---------|----------------------------|----------------------|----------|--------------------------|--------------------------|-----------------------------|-----------------------------------|------------------------------|
| SKZ_1489          | Gain        | 17  | p13.3    | chr17:735198-797669      | 62471   | No parental DNA available  | 0.000                | -        | no comparable CNVs       | Uncertain- likely benign | Benign                      | Uncertain- likely benign          | Benign                       |
| SKZ_1003          | Loss        | 17  | q11.2    | chr17:25972552-26066964  | 94412   | Inheritance - Maternal     | 0.000                | -        | no comparable CNVs       | Uncertain                | no comparable CNVs          | Uncertain- likely benign          | Uncertain- likely benign     |
| SKZ_1746          | Gain        | 18  | q11.2    | chr18:22883781-23015036  | 131255  | Inheritance - Maternal     | 0.000                | -        | no comparable CNVs       | no comparable CNVs       | Uncertain- likely benign    | no comparable CNVs                | Uncertain- likely benign     |
| SKZ_0369          | Loss        | 18  | q12.2    | chr18:34546490-34698627  | 152137  | Inheritance - Paternal     | 0.000                | -        | Uncertain                | Uncertain- likely benign | no comparable CNVs          | no comparable CNVs                | Uncertain- likely benign     |
| SKZ_1130          | Gain        | 19  | q13.41   | chr19:53647182-53693873  | 46691   | Inheritance - Undetermined | 0.000                | -        | no comparable CNVs       | Uncertain- likely benign | no comparable CNVs          | no comparable CNVs                | Uncertain- likely benign     |
| DE61OSOUKBD100294 | Loss        | 19  | q13.42   | chr19:55434213-55486661  | 52449   | Inheritance - Undetermined | 0.000                | -        | no comparable CNVs       | Uncertain- likely benign | no comparable CNVs          | no comparable CNVs                | Uncertain- likely benign     |
| DE67OSOUKBD100477 | Loss        | 20  | p13      | chr20:113651-184813      | 71163   | Inheritance - Undetermined | 0.000                | -        | no comparable CNVs       | Benign                   | no comparable CNVs          | Uncertain- likely benign          | Uncertain- likely benign     |
| SKZ_2052          | Loss        | 20  | p12.1    | chr20:15062923-15103156  | 40233   | Inheritance - Maternal     | 0.000                | -        | Uncertain- likely benign | Benign                   | no comparable CNVs          | Benign                            | Benign                       |
| SKZ_1679          | Loss        | 20  | p13      | chr20:3857650-3900324    | 42674   | Inheritance - Undetermined | 0.000                | -        | no comparable CNVs       | Uncertain- likely benign | no comparable CNVs          | no comparable CNVs                | Uncertain- likely benign     |
| DE92OSOUKBD100221 | Loss        | 20  | p13      | chr20:4931970-4972088    | 40119   | Inheritance - Undetermined | 0.000                | -        | no comparable CNVs       | Uncertain- likely benign | no comparable CNVs          | no comparable CNVs                | Uncertain- likely benign     |
| SKZ_1977          | Loss        | 20  | q11.23   | chr20:36905828-36972896  | 67068   | Inheritance - Maternal     | 0.000                | -        | no comparable CNVs       | Benign                   | Benign                      | Uncertain- likely benign          | Benign                       |
| DE83OSOUKBD100480 | Gain        | 21  | q21.1    | chr21:19622822-19810737  | 187916  | Inheritance - Undetermined | 0.000                | -        | no comparable CNVs       | no comparable CNVs       | Uncertain- likely benign    | Uncertain- likely benign          | Uncertain- likely benign     |
| DE02OSOUKBD100095 | Gain        | 21  | q22.12   | chr21:37487858-37598197  | 110340  | Inheritance - Undetermined | 0.000                | -        | Benign                   | Uncertain- likely benign | Benign                      | Benign                            | Benign                       |
| SKZ_1307          | Gain        | 21  | q22.2    | chr21:40100880-40154748  | 53868   | Inheritance - de novo      | 0.000                | -        | no comparable CNVs       | Uncertain- likely benign | Uncertain- likely benign    | Uncertain- likely benign          | Uncertain- likely benign     |
| SKZ_1825          | Loss        | 22  | q13.33   | chr22:50645586-50949482  | 303896  | Inheritance - not Maternal | 0.000                | -        | no comparable CNVs       | no comparable CNVs       | no comparable CNVs          | no comparable CNVs                | Uncertain                    |
| DE84OSOUKBD100074 | Gain        | 22  | q13.2    | chr22:43090481-43161021  | 70541   | Inheritance - Undetermined | 0.000                | -        | no comparable CNVs       | Uncertain- likely benign | no comparable CNVs          | no comparable CNVs                | Uncertain- likely benign     |
| DE37OSOUKBD100144 | Loss        | 22  | q12.1    | chr22:26838242-26881031  | 42790   | Inheritance - maternal     | 0.000                | -        | no comparable CNVs       | no comparable CNVs       | no comparable CNVs          | no comparable CNVs                | Uncertain- likely benign     |
| SKZ_1780          | Gain        | 22  | q11.21   | chr22:18637139-20289862  | 1652723 | Inheritance - Maternal     | 0.000                | -        | Pathogenic               | Pathogenic               | Uncertain- likely benign    | Uncertain- likely benign          | Uncertain- likely pathogenic |
| DE29OSOUKBD100191 | Gain        | X   | q13.1    | chrX:71537559-71609005   | 71447   | Inheritance - Undetermined | 0.000                | -        | Uncertain- likely benign | no comparable CNVs       | Uncertain- likely benign    | no comparable CNVs                | Uncertain- likely benign     |
| SKZ_1743          | Gain        | X   | p22.31   | chrX:8075662-8148705     | 73043   | Inheritance - Undetermined | 0.000                | -        | Uncertain                | Uncertain- likely benign | Benign                      | no comparable CNVs                | Benign                       |
| DE86OSOUKBD100232 | Gain        | X   | q28      | chrX:154873222-155010594 | 137373  | Inheritance - Undetermined | 0.000                | -        | no comparable CNVs       | Uncertain- likely benign | Uncertain- likely benign    | no comparable CNVs                | Uncertain- likely benign     |
| DE46OSOUKBD100176 | Gain        | X   | p22.2    | chrX:13354873-13493086   | 138214  | Inheritance - Undetermined | 0.000                | -        | Benign                   | Uncertain- likely benign | Uncertain- likely benign    | no comparable CNVs                | Uncertain- likely benign     |
| SKZ_2027          | Gain        | X   | p22.33   | chrX:1427577-1592679     | 165102  | Inheritance - Maternal     | 0.000                | -        | Uncertain- likely benign | Uncertain                | Benign                      | no comparable CNVs                | Uncertain- likely benign     |
| SKZ_0374          | Gain        | X   | p22.33   | chrX:636950-820594       | 183644  | Inheritance - Paternal     | 0.000                | -        | Uncertain                | Uncertain                | Benign                      | no comparable CNVs                | Uncertain- likely benign     |
| SKZ_1508          | Gain        | X   | p22.33   | chrX:417624-636092       | 218468  | Inheritance - Maternal     | 0.000                | 12       | Uncertain                | Uncertain- likely benign | Benign                      | no comparable CNVs                | Uncertain- likely benign     |
| DE94OSOUKBD100282 | Gain        | X   | p22.33   | chrX:370599-612414       | 241816  | Inheritance - Undetermined | 0.000                | 12       | Uncertain                | Uncertain- likely benign | Benign                      | no comparable CNVs                | Uncertain- likely benign     |
| SKZ_0887          | Gain        | X   | p22.33   | chrX:2059627-2314248     | 254621  | Inheritance - Maternal     | 0.000                | -        | Uncertain- likely benign | Uncertain                | Uncertain- likely benign    | no comparable CNVs                | Uncertain- likely benign     |
| DE27OSOUKBD100227 | Gain        | X   | p22.31   | chrX:8219053-8484026     | 264974  | Inheritance - Undetermined | 0.000                | -        | Uncertain                | Uncertain- likely benign | Benign                      | no comparable CNVs                | Benign                       |
| SKZ_0680          | Nullizygous | X   | p22.2    | chrX:10299643-10638042   | 338399  | Inheritance - Maternal     | 0.000                | -        | no comparable CNVs       | no comparable CNVs       | no comparable CNVs          | no comparable CNVs                | Pathogenic                   |
| SKZ_1855          | Gain        | X   | q22.3    | chrX:105098359-105625090 | 526731  | No parental DNA available  | 0.000                | -        | no comparable CNVs       | Uncertain- likely benign | Uncertain- likely benign    | no comparable CNVs                | Uncertain- likely benign     |
| SKZ_0887          | Gain        | X   | q26.1    | chrX:129681013-130305495 | 624482  | Inheritance - Maternal     | 0.000                | -        | no comparable CNVs       | no comparable CNVs       | Uncertain- likely benign    | no comparable CNVs                | Uncertain- likely benign     |
| SKZ_1932          | Gain        | X   | p11.3    | chrX:44073185-44716100   | 642915  | Inheritance - Undetermined | 0.000                | -        | Uncertain                | no comparable CNVs       | Uncertain- likely benign    | no comparable CNVs                | Uncertain- likely benign     |
| SKZ_0374          | Gain        | X   | p22.33   | chrX:426736-1215426      | 788690  | Inheritance - Paternal     | 0.000                | 12       | Uncertain                | Uncertain- likely benign | Benign                      | no comparable CNVs                | Uncertain- likely benign     |
